# Supplementary material
Source: PubMed Central journal article supplement (PMC3747232)

## SUPPLEMENTAL DATA

**Figure. S1. Naïve WT and H<sub>1.4</sub>RKO mice exhibit normal immune system.** Single-cell suspensions of thymus, lymph node, and spleen were prepared from WT and H<sub>1.4</sub>RKO mice. (A) The total number of thymic, lymph node, and spleen cells was enumerated and shown as mean  $\pm$  SEM of n = 10 per strain. Flow cytometric analysis of immune cell subpopulations in (B) thymus, (C) a representative dot plot of thymic double negative, double positive, and single positive CD4 and CD8, (D) lymph node, and (E) spleen of WT and H<sub>1.4</sub>RKO mice was also performed and shown as mean  $\pm$  SEM of n = 10 per strain. (F) The frequency of Foxp3<sup>+</sup> cells in thymus, spleen, and lymph node was also determined and shown as mean  $\pm$  SEM of n = 10 per strain. (G) The total number of peripheral WBCs and (H) peripheral WBC differentials between WT and H<sub>1.4</sub>RKO mice was determined and shown as mean  $\pm$  SEM of n = 5 per strain. In (A, B, C, D, E, and G), significance of differences was determined by two-way ANOVA followed by Bonferroni post-hoc multiple comparison test (\*\*,  $p < 0.01$ ; \*\*\*\*,  $p < 0.0001$ ) and in (F), by Mann Whitney test.

**Figure. S2 HA concentration in plasma of WT and H<sub>1.4</sub>RKO mice.** HA concentrations were assessed in the plasma using an enzyme immune assay kit. Significance of differences in HA concentrations between strains were determined using the Mann Whitney test (\*\*\*\*,  $p < 0.0001$ ). Data are shown as mean  $\pm$  SEM of n = 5 per strain.

**Figure. S3. Frequency of inflammatory immune cell types in the CNS and DLN of immunized H<sub>1.4</sub>RKO mice.** Mononuclear cells were isolated from the CNS and DLN of 1 $\times$  immunized mice on d15 post-immunization, stimulated with PMA/ionomycin for 4 hours in the presence of Brefeldin A, stained, and analyzed by flow cytometry. (A) Total number of infiltrating cells in the CNS of immunized WT and H<sub>1.4</sub>RKO mice. (B-E) Flow cytometric data

of the frequency of cells from CNS and (F and G) the percentage of IFN- $\gamma$ <sup>+</sup> and IL-17<sup>+</sup> (gated on TCR $\gamma$  $\delta$ <sup>+</sup> and TCR $\alpha\beta$ <sup>+</sup>CD8<sup>+</sup>) cells from CNS of WT and H<sub>1.4</sub>RKO mice. (H-K) Flow cytometric data of the frequency of cells from DLN and (L) the percentage of IFN- $\gamma$ <sup>+</sup> and IL-17<sup>+</sup> (gated on TCR $\alpha\beta$ <sup>+</sup>CD8<sup>+</sup>) cells from the DLN of WT and H<sub>1.4</sub>RKO mice. Data are shown as mean  $\pm$  SEM of n = 8 per strain. In (B, C, E, F, G, H, and K) significance of differences observed was determined by two-way ANOVA followed by Bonferroni's post hoc multiple comparison test and in (A, B, E, J, and K) by Mann Whitney test.

# Figure. S1

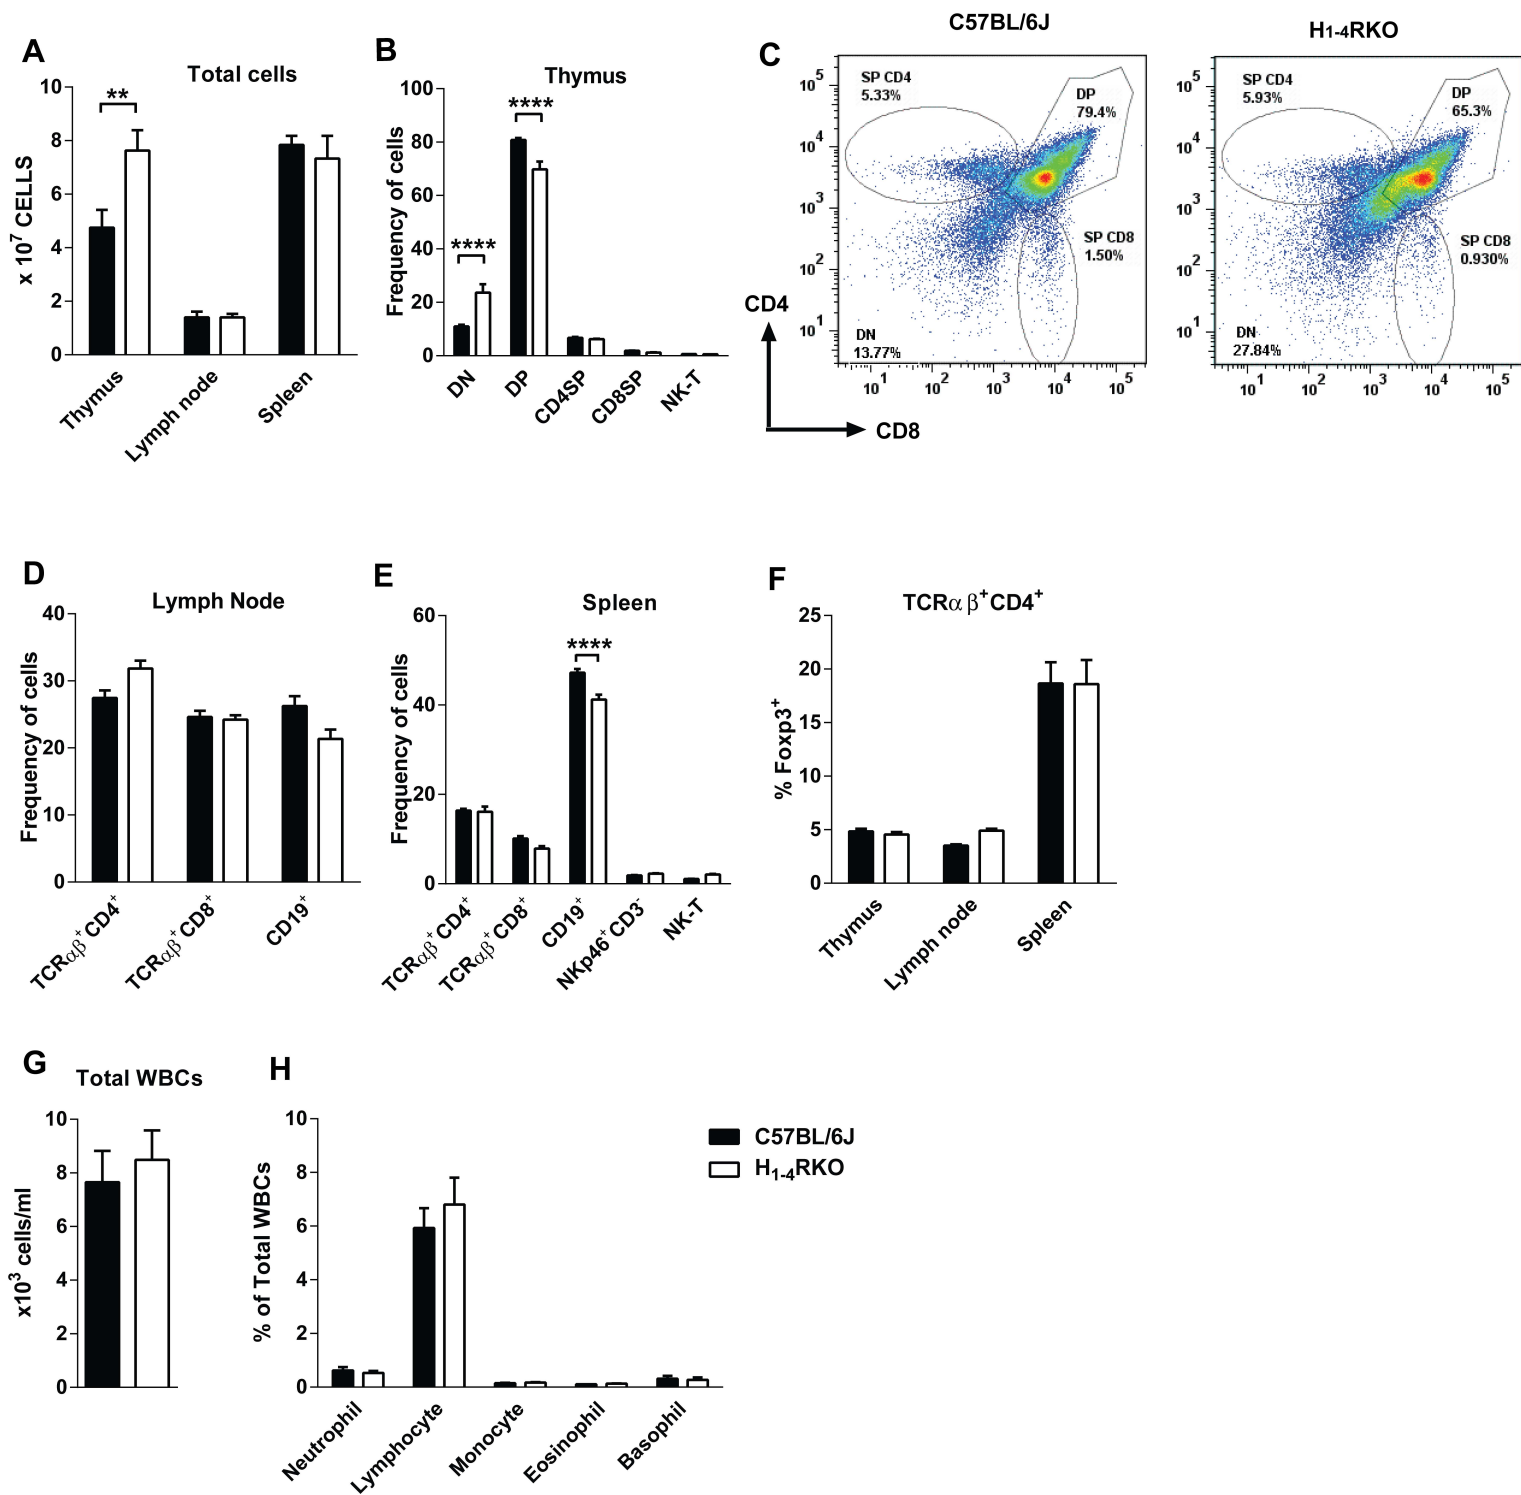

# Figure. S2

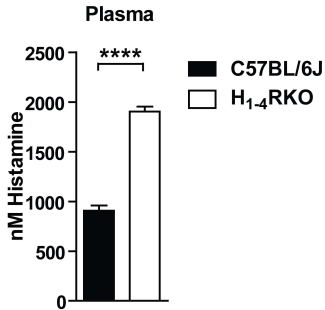

# Figure. S3

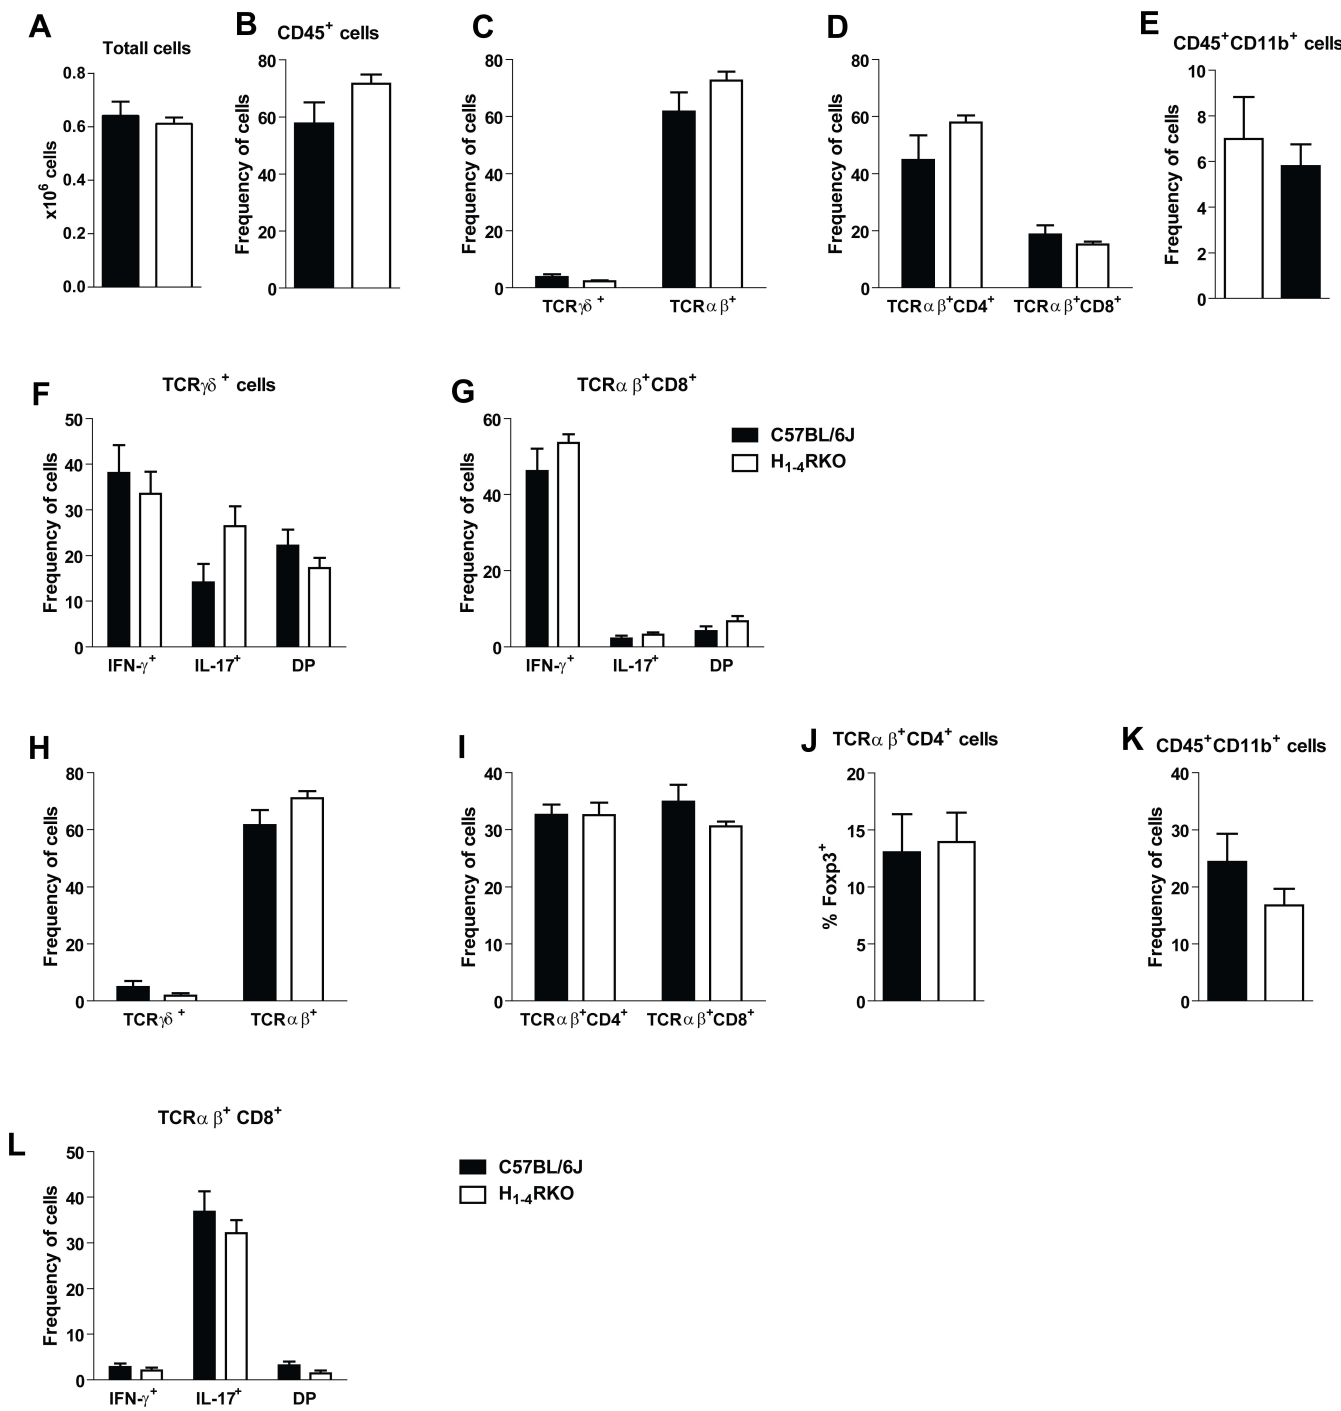

Supplement: NIHMS485089-supplement-1.pdf [file NIHMS485089-supplement-1.pdf]
